# Supplementary figures and images for: KIF23 Predict Immune Infiltration and Overall Survival in Gastric Cancer
Source: Research Square preprint supplement (doi:10.21203/rs.3.rs-1222170/v1), 2022-01-11

Supplementary Figure S2


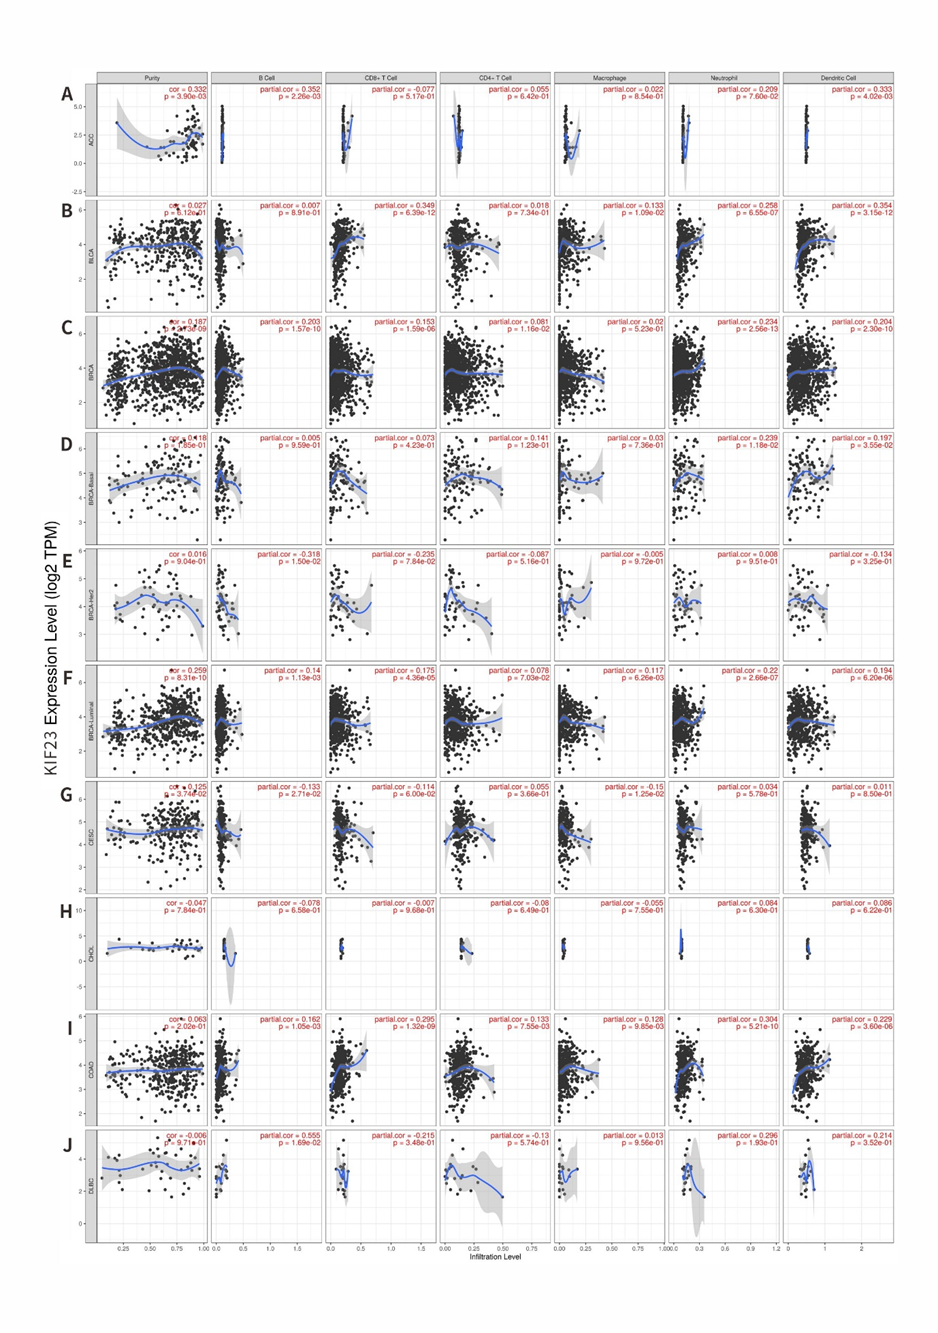


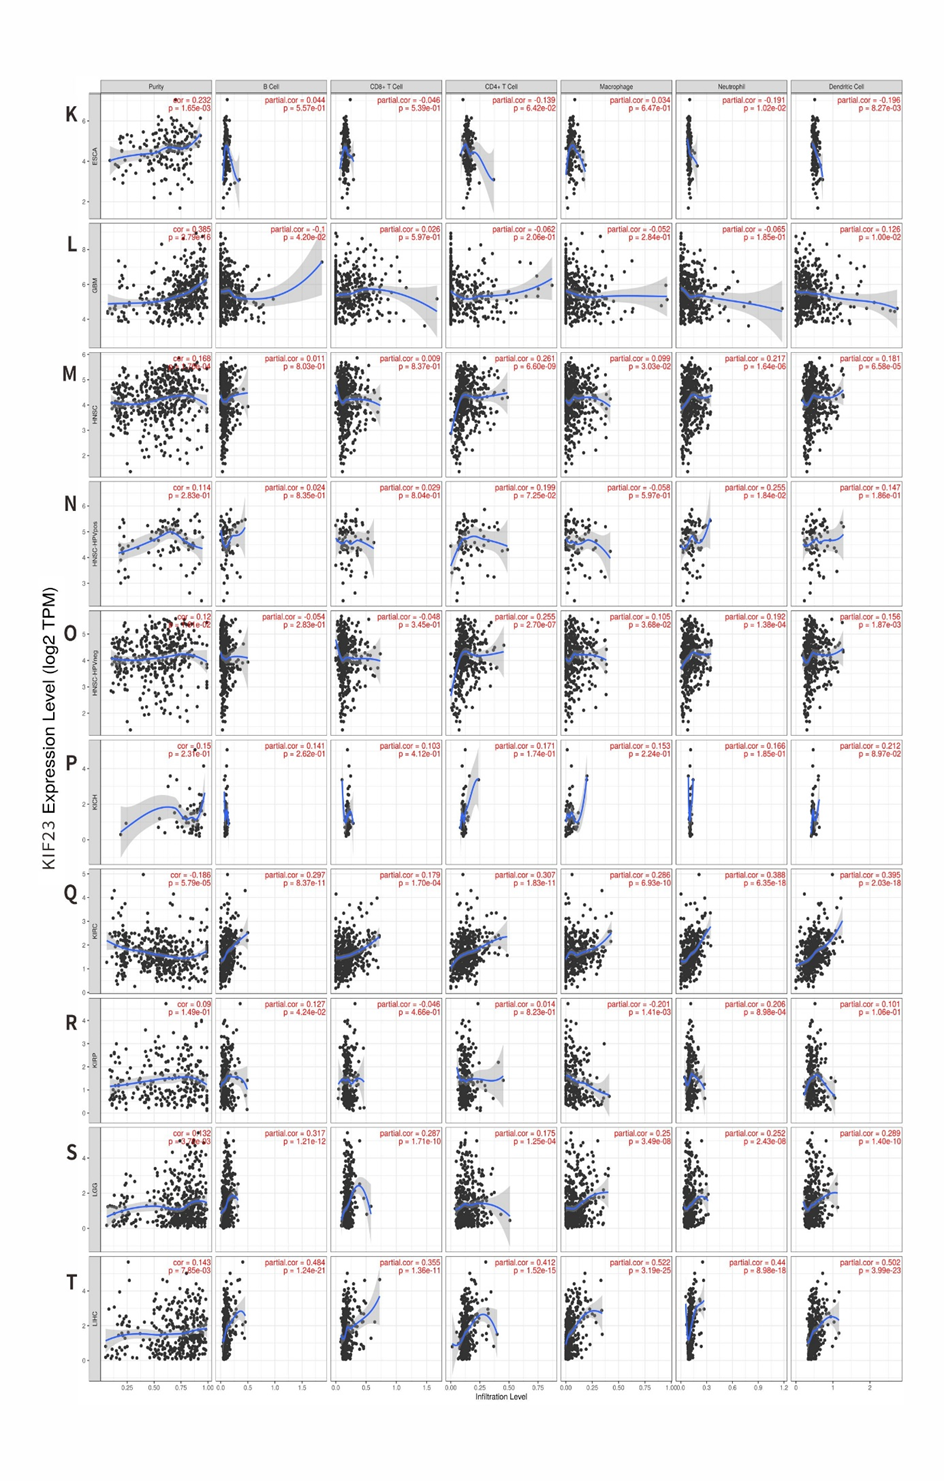


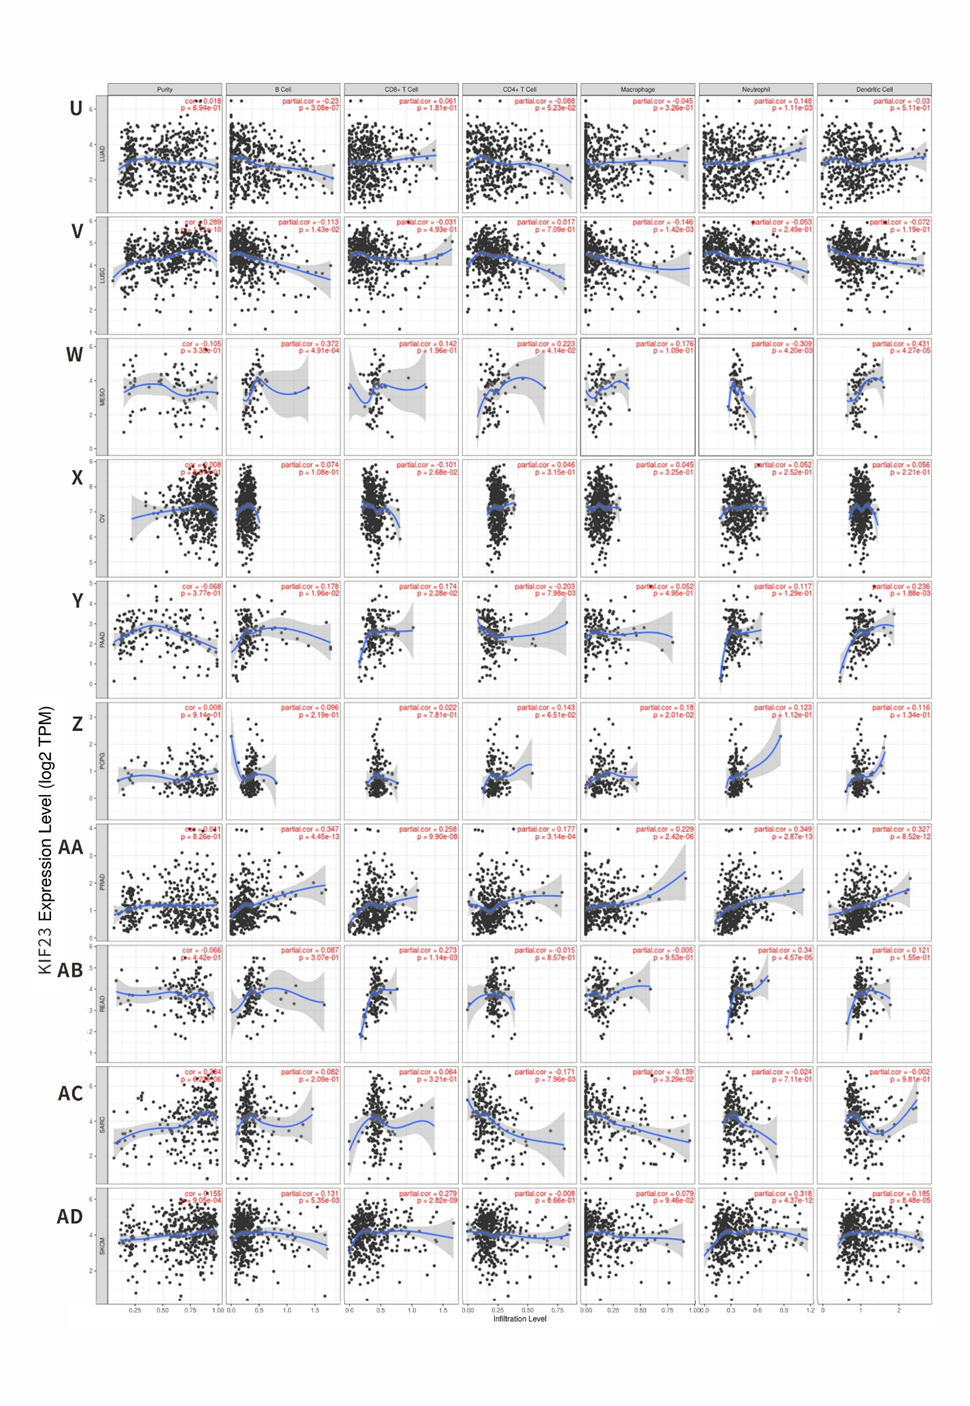


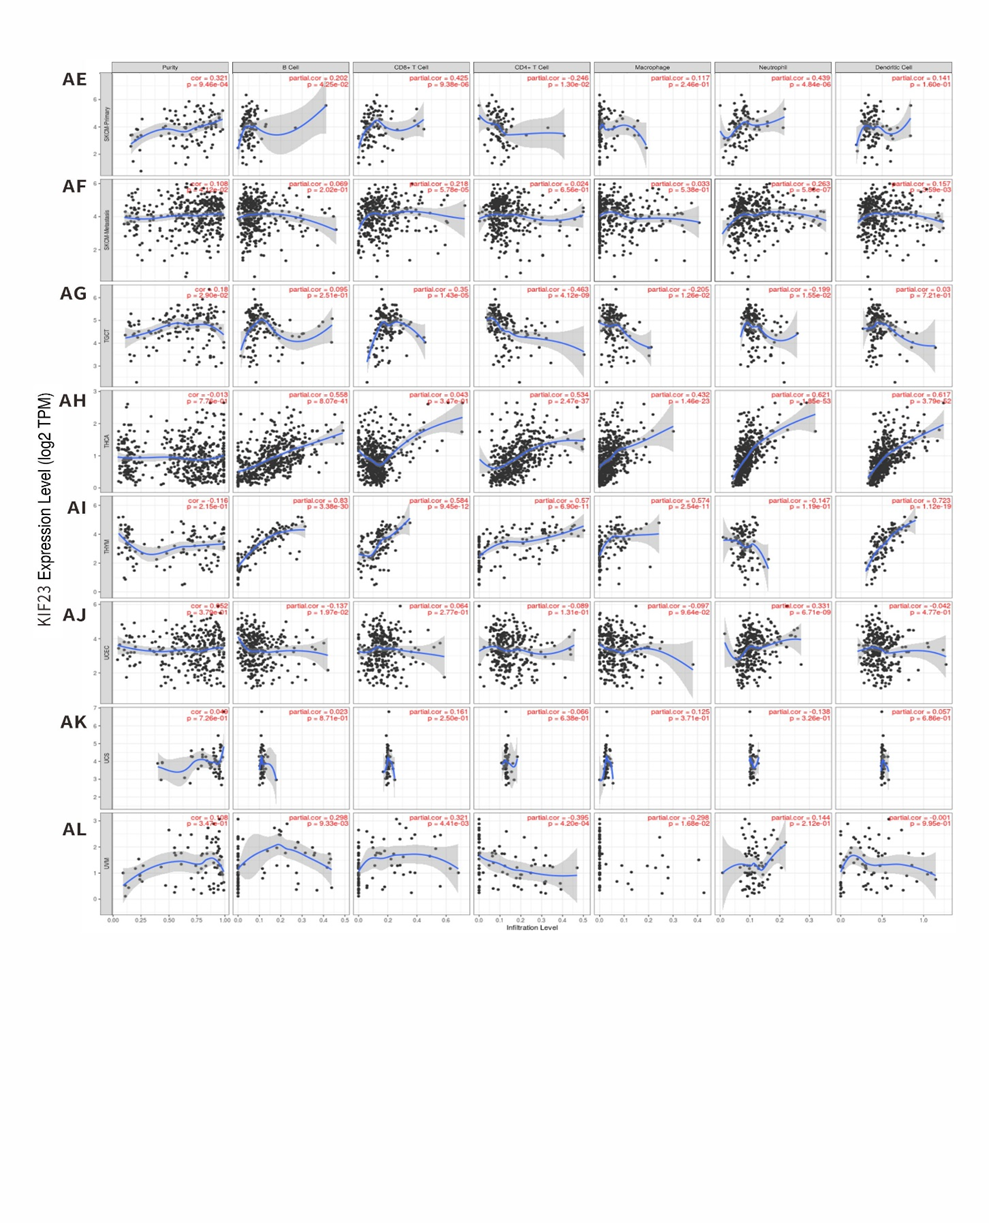

Supplement: Supplementary file 2 [file 93124bba1a7ff88470f62775.docx]
